# Supplementary material
Source: publisher figshare collection journal article supplement (https://adisjournals.figshare.com/ndownloader/files/41382021)
Supplement: Supplementary file 1 [file 41382021]

## Oteseconazole: Adis Evaluation

### Clinical Considerations

- First drug approved in the USA for RVVC
- Approval restricted to patients who are not of reproductive potential due to risk of embryo-fetal toxicity
- Reduces the recurrence of VVC compared with placebo
- Inhibits the growth of fluconazole-resistant strains of *Candida*
- Well tolerated, with the most common adverse reactions being headache and nausea

### Plain Language Summary

#### *Background and rationale*

- Recurrent vulvovaginal candidiasis (RVVC), commonly known as chronic vaginal yeast infection, causes physical discomfort and psychological distress
- Current recommended treatments, including azole antifungals (e.g., fluconazole), for RVVC fail to prevent recurrence in about half of patients

#### *Clinical findings*

- Oteseconazole (Vivjoa®) is the first drug to gain approval for the treatment of RVVC in the USA after it significantly reduced the incidence of vulvovaginal candidiasis (VVC) recurrence in patients compared with placebo in pivotal phase 3 trials
- Oteseconazole reduces recurrence for over 36 weeks after the final dose of the drug, has activity against *Candida* strains that are resistant to azole antifungals, and is generally well tolerated

#### *Conclusion*

Oteseconazole is a valuable addition to the drugs available to treat RVVC

This plain language summary represents the opinions of the authors. For a full list of declarations, including funding and author disclosure statements, and copyright information, please see the full text online. © Springer Nature Switzerland AG 2023.
